# Supplementary material for: Ligand substitution effect on single-molecule magnet behavior in dinuclear dysprosium complexes with radical functionalized phenol as bridging ligands
Source: Royal Society of Chemistry journal article supplement (doi:10.1039/c2dt31310c), 2012-01-01
Supplement: c2dt31310c.pdf [file c2dt31310c.pdf]

## Supporting Information

### **Ligand substitut ion effect on single-molecule magnet behavior in dinuclear dysprosium complexes with radical functionalized phenol as bridging ligands**

**Ruina Liu<sup>a</sup>, Congming Zhang<sup>a</sup>, Licun Li<sup>\*a,b</sup>, Daizheng Liao<sup>a</sup>, Jean-Pascal Sutter<sup>\*c,d</sup>**

*<sup>a</sup> Department of Chemistry, Key Laboratory of Advanced Energy Materials Chemistry and Key Laboratory of Advanced Energy Materials Chemistry Nankai University, Tianjin 300071, China*

*<sup>b</sup> CNRS ; LCC (Laboratoire de Chimie de Coordination) ; 205, Route de Narbonne, F-31077 Toulouse, France*

*<sup>c</sup> Université de Toulouse ; UPS, INPT ; LCC ; F-31077 Toulouse, France*

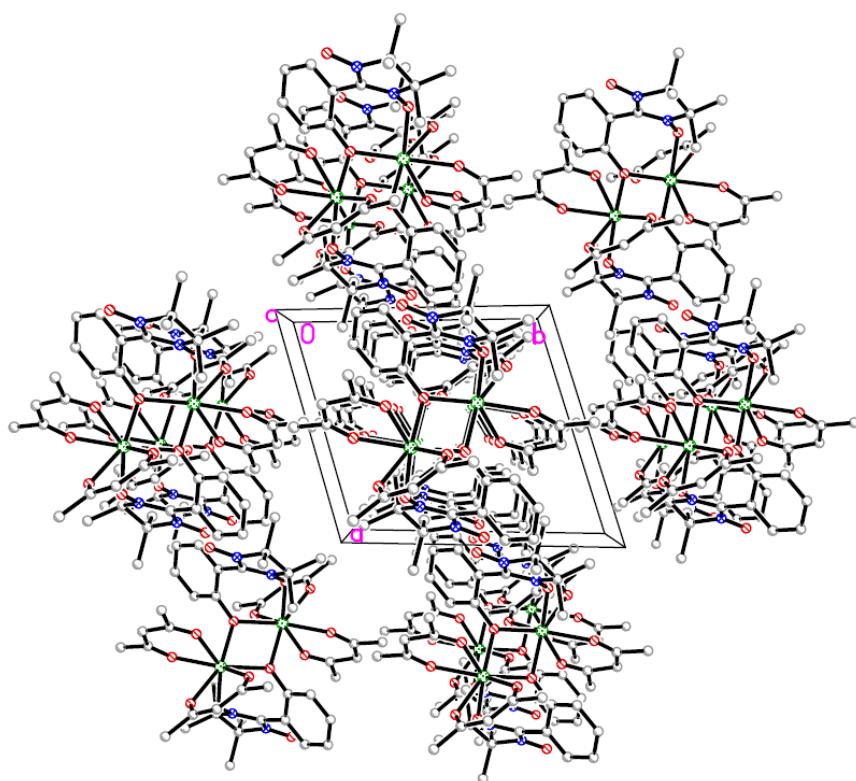

**Figure S1.** The molecular packing structure of compound 1 (Hydrogen and fluorine atoms are omitted for clarity).

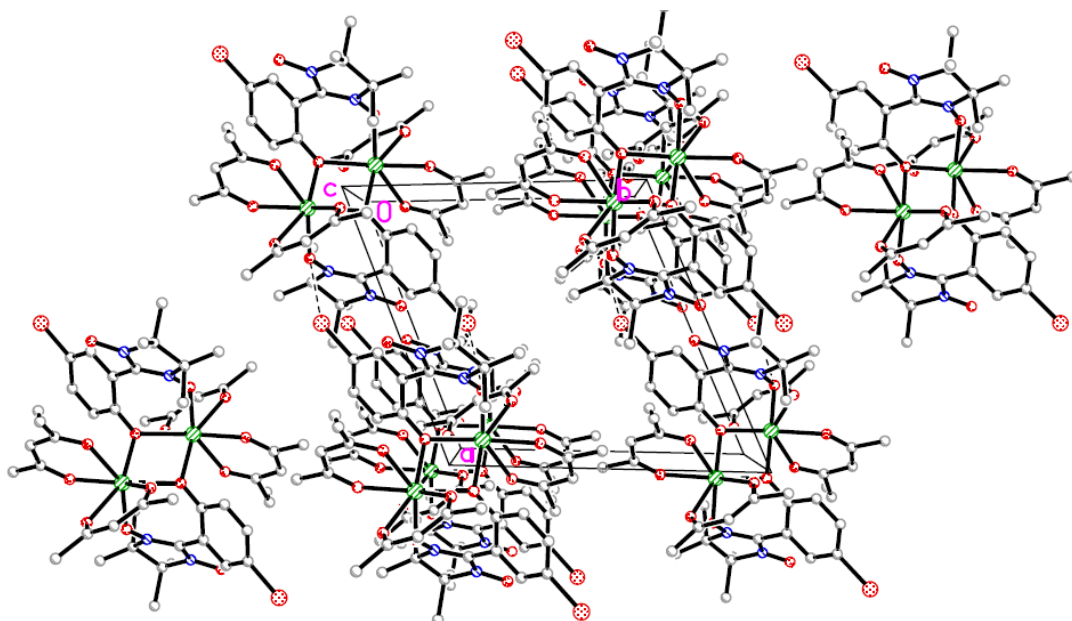

**Figure S2.** The molecular packing structure of compound 2 (Hydrogen and fluorine atoms are omitted for clarity).

**Table SI\_1.** Results of the SHAPE<sup>1</sup> analysis for the DyO<sub>7</sub> coordination sphere<sup>2</sup> in compounds **1** and **2**. The figure shows the capped octahedron for coordination sphere of Dy in compound **1**.

| Structure [DyO <sub>7</sub> ] | (PBPY-7) <sup>a</sup> | (COC-7) <sup>a</sup> | (CTPR-7) <sup>a</sup> | (JPBPY-7) <sup>a</sup> | (JETPY-7) <sup>a</sup> |
|-------------------------------|-----------------------|----------------------|-----------------------|------------------------|------------------------|
| <b>1</b>                      | 8.246                 | <b>0.366</b>         | 2.055                 | 11.376                 | 18.781                 |
| <b>2</b>                      | 8.245                 | <b>0.297</b>         | 1.740                 | 11.353                 | 17.886                 |

<sup>a</sup> PBPY-7: (D<sub>5h</sub>) Pentagonal bipyramid; COC-7: (C<sub>3v</sub>) Capped octahedron; CTPR-7: (C<sub>2v</sub>) Capped trigonal prism; JPBPY-7: (D<sub>5h</sub>) Johnson pentagonal bipyramid J13; JETPY-7: (C<sub>3v</sub>) Johnson elongated triangular pyramid J7.

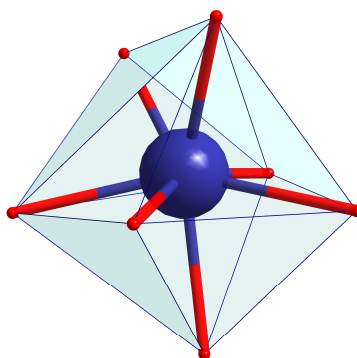

<sup>1</sup> Llunell, M.; Casanova, D.; Cirera, J.; Bofill, J. M.; Alemany, P.; Alvarez, S.; Pinsky, M.; Avnir, D. *SHAPE: Continuous shape measures of polygonal and polyhedral molecular fragments*, 1.1b; University of Barcelona and The Hebrew University of Jerusalem: Barcelona, 2005.

<sup>2</sup> Casanova, D.; Alemany, P.; Bofill, J.M.; Alvarez, S., *Chem. Eur. J.* **2003**, *9*, 1281.

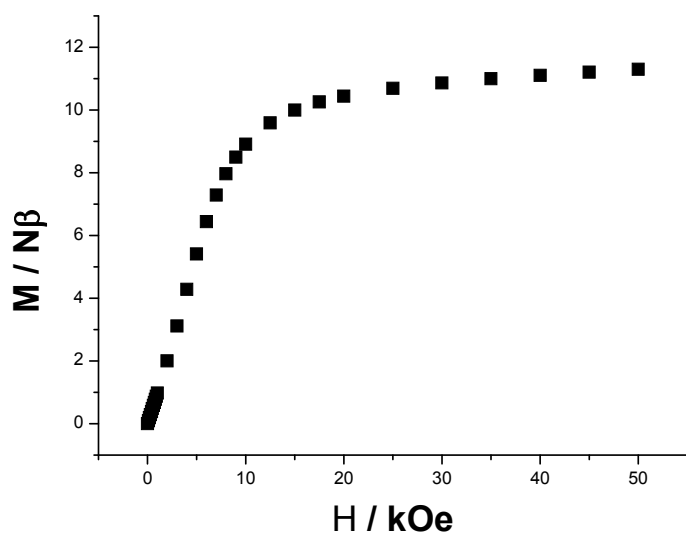

**Figure S3.** The  $M$  versus  $H$  plot for **1** at 2.0K

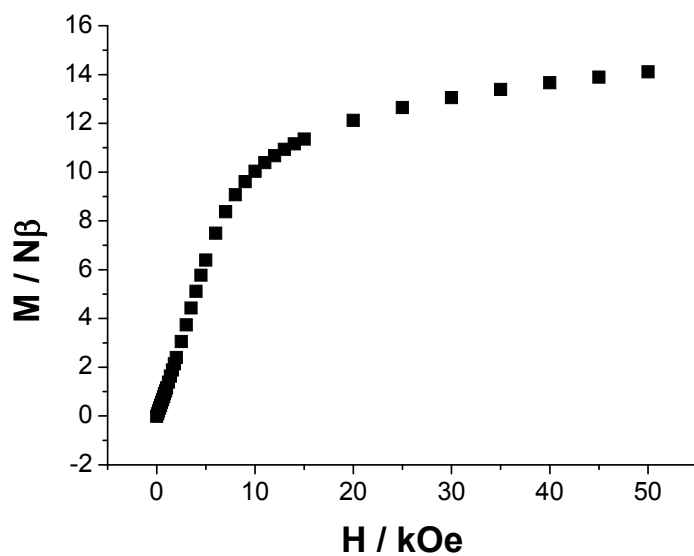

**Figure S4.** The  $M$  versus  $H$  plot for **2** at 2.0K

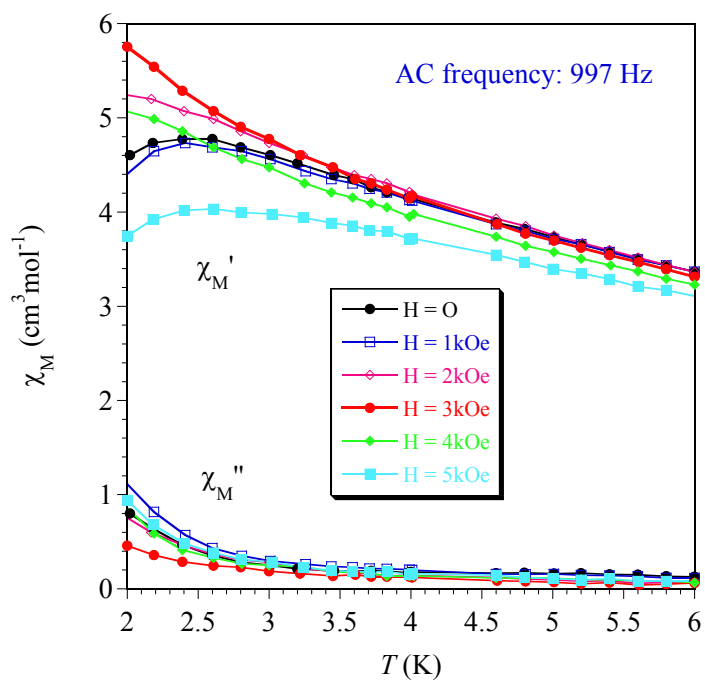

**Figure S5.** Temperature dependence of the in-phase ( $\chi'$ ) and the out-of-phase ( $\chi''$ ) ac susceptibility components for **1** with different applied dc fields and an oscillation of 3.0 Oe (freq = 997 Hz).

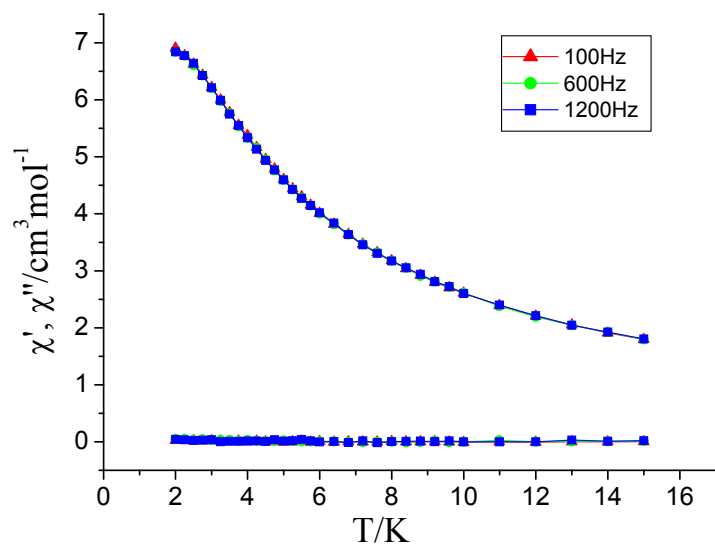

**Figure S6.** Temperature dependence of the in-phase ( $\chi'$ ) ac susceptibility components at different frequencies for **2** with zero dc field and an oscillation of 3.0 G.
